# Supplementary material
Source: Springer Nature journal article supplement (https://www.springermedizin.de/resource/supplementary/12879_2011_1656_MOESM2_ESM.pdf/9442988)

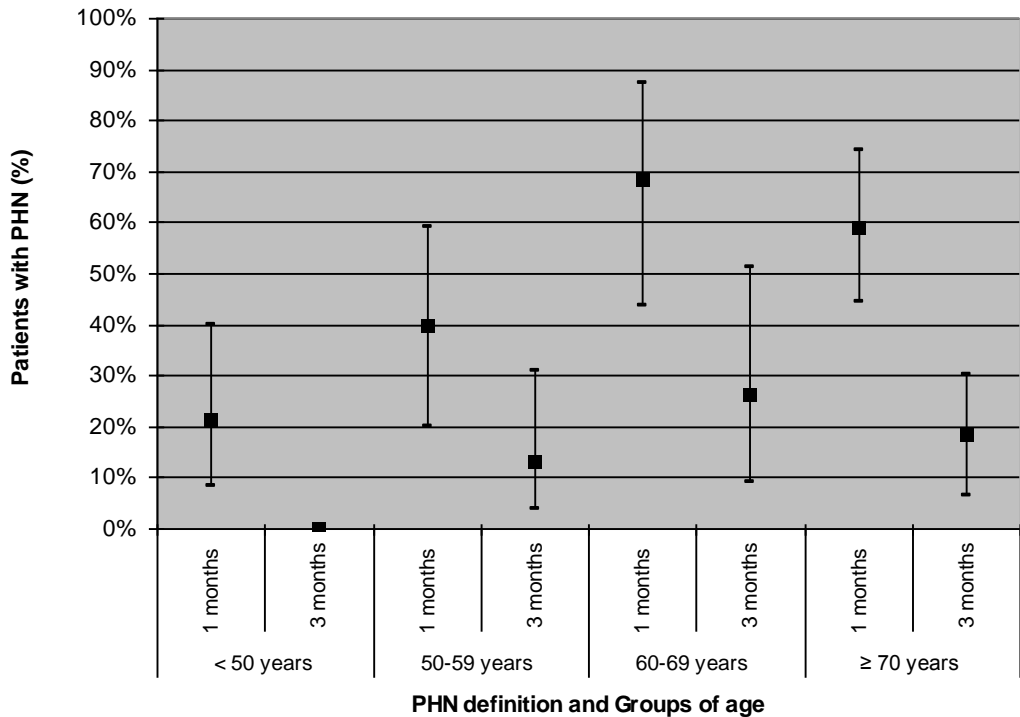

Supplement: MOESM2 [file 9442988]
